# Supplementary material
Source: MDPI journal article supplement (https://www.mdpi.com/2073-4344/11/1/63)
Supplement: s1 [file s1]

**Table S1: EDX elemental analysis for of ZnO nanostructures synthesized using different solvents**

| Sample     | Atomic% |       | Weight% |       |
|------------|---------|-------|---------|-------|
|            | Zn      | O     | Zn      | O     |
| ZnO sphere | 44.97   | 55.03 | 58.45   | 41.55 |
| ZnO rod    | 44.85   | 55.15 | 58.01   | 41.99 |
| ZnO petal  | 43.42   | 56.58 | 57.04   | 42.96 |

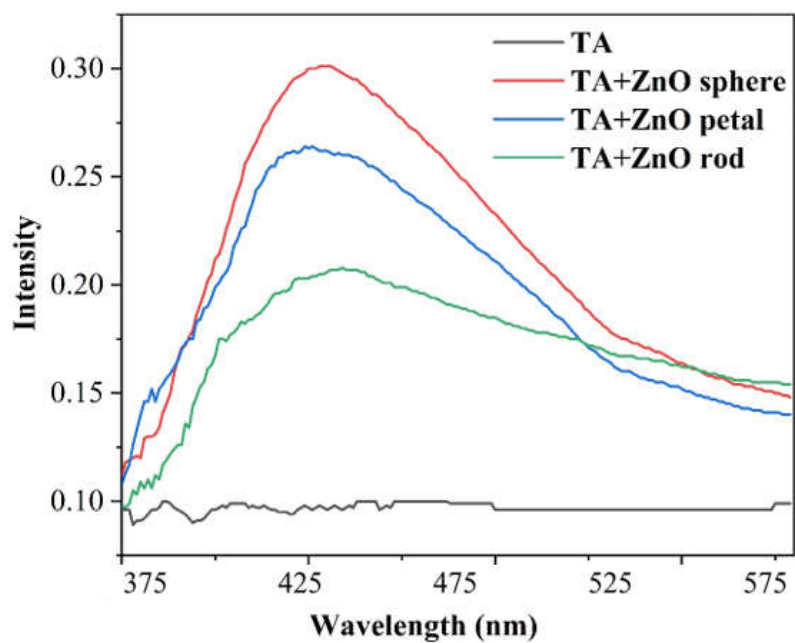

**Figure S1: Fluorescence spectra of terephthalic acid (TA) in absence and presence of ZnO nanostructures. Characteristic peak at 425 nm was used as an indicator for hydroxyl radical production.**

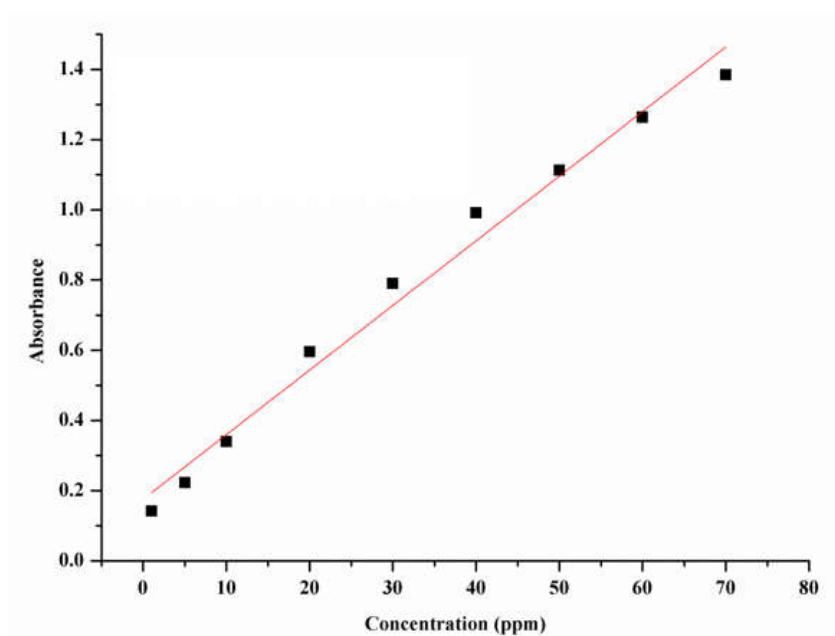

**Figure S2: Calibration curve for caffeine**

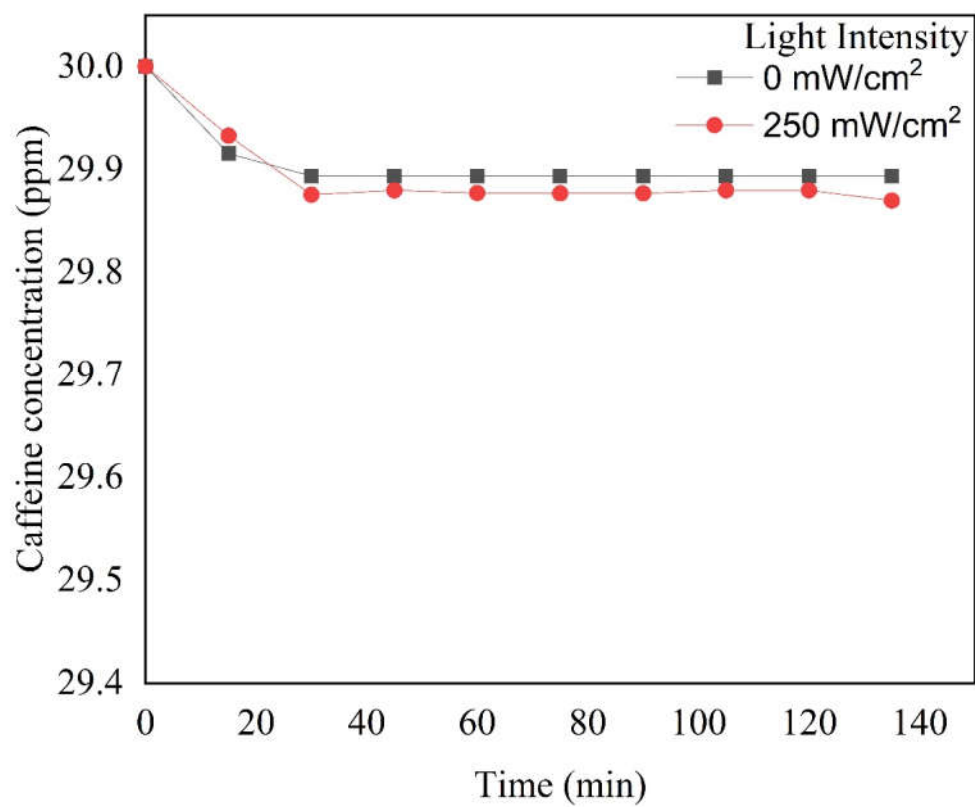

**Figure S3: Photolysis of caffeine in absence of nanoparticles**
